# Supplementary material for: Periodontitis and the risk of oral cancer: a meta-analysis of case-control studies
Source: PubMed Central journal article supplement (PMC11302657; doi:10.2340/aos.v83.40478), 2024-05-14
Supplement: AOS-83-40478-s1.pdf [file AOS-83-40478-s1.pdf]

Supplementary material has been published as submitted. It has not been copyedited or typeset by Acta Odontologica Scandinavica.

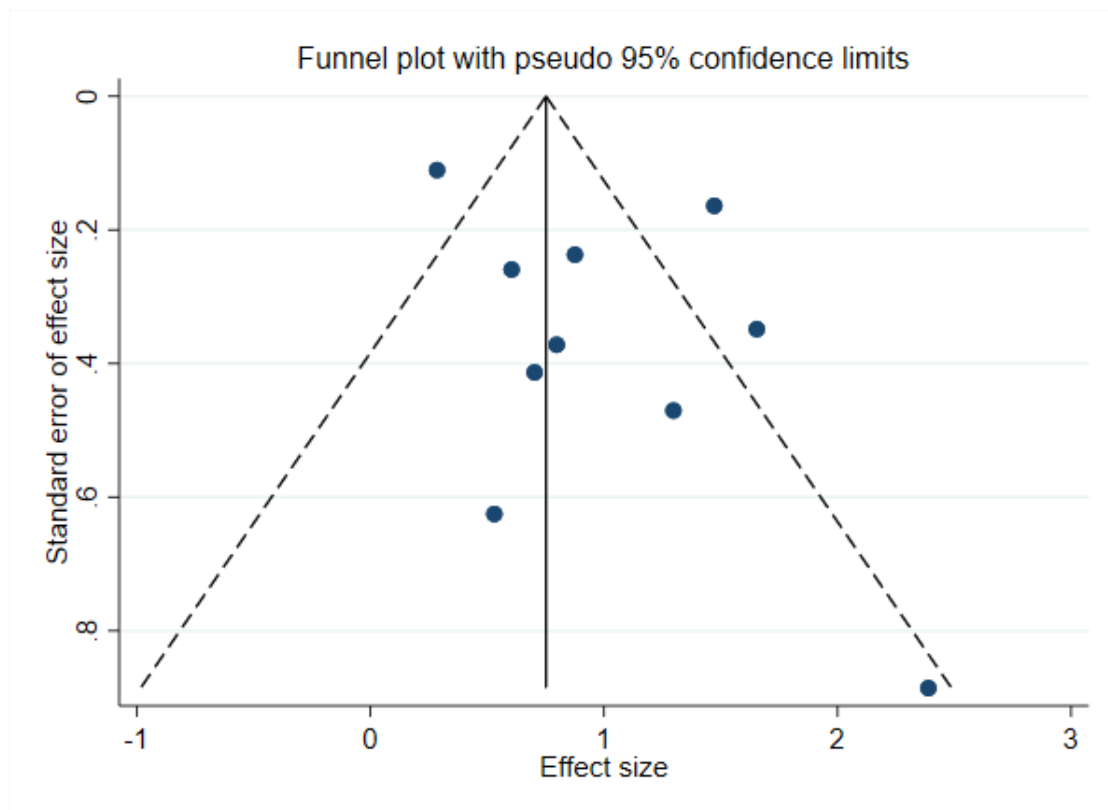

Figure S1. Funnel plot of the publication bias for the included studies assessing the association between periodontal disease and oral cancer.
