# Supplementary material for: Periodontitis and the risk of oral cancer: a meta-analysis of case-control studies
Source: PubMed Central journal article supplement (PMC11302657; doi:10.2340/aos.v83.40478), 2024-05-14
Supplement: AOS-83-40478-s2.pdf [file AOS-83-40478-s2.pdf]

Supplementary material has been published as submitted. It has not been copyedited or typeset by Acta Odontologica Scandinavica.

**Table S1:** Literature search strategy

1.Pubmed

| Search number | Query                                                                                                                                                                                                                                                                                                                                                                                                                                                                                                                                                                                                                                                                                                                                                                                                                                                                                                                                                                                                                                                                                                                                                                                                                                                                                                                                                                                                                                                                                                                                                                                                                                   | Records |
|---------------|-----------------------------------------------------------------------------------------------------------------------------------------------------------------------------------------------------------------------------------------------------------------------------------------------------------------------------------------------------------------------------------------------------------------------------------------------------------------------------------------------------------------------------------------------------------------------------------------------------------------------------------------------------------------------------------------------------------------------------------------------------------------------------------------------------------------------------------------------------------------------------------------------------------------------------------------------------------------------------------------------------------------------------------------------------------------------------------------------------------------------------------------------------------------------------------------------------------------------------------------------------------------------------------------------------------------------------------------------------------------------------------------------------------------------------------------------------------------------------------------------------------------------------------------------------------------------------------------------------------------------------------------|---------|
| #1            | "Periodontitis"[Mesh]<br>((((((((((((((((((((((((((((((((((((((((Periodontitis[Title/Abstract] OR (Periodontitides[Title/Abstract])) OR (Pericementitis[Title/Abstract])) OR (Pericementitides[Title/Abstract])) OR (Paradontitis[Title/Abstract])) OR (Parodontitis[Title/Abstract])) OR (peridontitis[Title/Abstract])) OR (periodontal diseases[Title/Abstract])) OR (Disease, Periodontal[Title/Abstract])) OR (Diseases, Periodontal[Title/Abstract])) OR (Periodontal Disease[Title/Abstract])) OR (Parodontosis[Title/Abstract])) OR (Parodontoses[Title/Abstract])) OR (Pyorrhoea Alveolaris[Title/Abstract])) OR (dental loss[Title/Abstract])) OR (dental migration[Title/Abstract])) OR (dental mobility[Title/Abstract])) OR (furcation defects[Title/Abstract])) OR (mesial movement of teeth[Title/Abstract])) OR (paradontal disease[Title/Abstract])) OR (paradontopathy[Title/Abstract])) OR (paraodontopathy[Title/Abstract])) OR (parodontopathy[Title/Abstract])) OR (parodontal disease[Title/Abstract])) OR (parodontium disease[Title/Abstract])) OR (parodontive tissue disease[Title/Abstract])) OR (peridontal disease[Title/Abstract])) OR (peridontal tissue disease[Title/Abstract])) OR (peridontium disease[Title/Abstract])) OR (periodontal atrophy[Title/Abstract])) OR (periodontal attachment loss[Title/Abstract])) OR (periodontal infection[Title/Abstract])) OR (periodontium disease[Title/Abstract])) OR (periodontopathy[Title/Abstract])) OR (tooth loss[Title/Abstract])) OR (tooth migration[Title/Abstract])) OR (tooth mobility'[Title/Abstract])) OR (tooth movement[Title/Abstract])) | 34306   |
| #2            | "Mouth Neoplasms"[Mesh]<br>((((((((((((((((((((((((((((((((((((((((Mouth Neoplasms[Title/Abstract] OR (Mouth Neoplasm[Title/Abstract])) OR (Neoplasm, Mouth[Title/Abstract])) OR (Neoplasms, Oral[Title/Abstract])) OR (Neoplasm, Oral[Title/Abstract])) OR (Oral Neoplasm[Title/Abstract])) OR (Oral Neoplasms[Title/Abstract])) OR (Neoplasms, Mouth[Title/Abstract])) OR (Cancer of Mouth[Title/Abstract])) OR (Mouth Cancers[Title/Abstract])) OR (Oral Cancer[Title/Abstract])) OR (Cancer, Oral[Title/Abstract])) OR (Cancers, Oral[Title/Abstract])) OR (Oral Cancers[Title/Abstract])) OR (Cancer of the Mouth[Title/Abstract])) OR (Mouth Cancer[Title/Abstract])) OR (Cancer, Mouth[Title/Abstract])) OR (Cancers, Mouth[Title/Abstract])) OR (cancer, mouth[Title/Abstract])) OR (intraoral cancer[Title/Abstract])) OR (mouth mucosa cancer[Title/Abstract])) OR (oral cancer[Title/Abstract])) OR (oral cavity cancer[Title/Abstract])) OR (mouth tumor[Title/Abstract])) OR (buccal mucosa tumor[Title/Abstract])) OR (buccal mucosa tumour[Title/Abstract])) OR (intraoral tumor[Title/Abstract])) OR (intraoral tumour[Title/Abstract])) OR (mouth cavity tumor[Title/Abstract])) OR (mouth cavity tumour[Title/Abstract]))                                                                                                                                                                                                                                                                                                                                                                                             | 70428   |
| #3            | "Mouth Neoplasms"[Mesh]<br>((((((((((((((((((((((((((((((((((((((((Mouth Neoplasms[Title/Abstract] OR (Mouth Neoplasm[Title/Abstract])) OR (Neoplasm, Mouth[Title/Abstract])) OR (Neoplasms, Oral[Title/Abstract])) OR (Neoplasm, Oral[Title/Abstract])) OR (Oral Neoplasm[Title/Abstract])) OR (Oral Neoplasms[Title/Abstract])) OR (Neoplasms, Mouth[Title/Abstract])) OR (Cancer of Mouth[Title/Abstract])) OR (Mouth Cancers[Title/Abstract])) OR (Oral Cancer[Title/Abstract])) OR (Cancer, Oral[Title/Abstract])) OR (Cancers, Oral[Title/Abstract])) OR (Oral Cancers[Title/Abstract])) OR (Cancer of the Mouth[Title/Abstract])) OR (Mouth Cancer[Title/Abstract])) OR (Cancer, Mouth[Title/Abstract])) OR (Cancers, Mouth[Title/Abstract])) OR (cancer, mouth[Title/Abstract])) OR (intraoral cancer[Title/Abstract])) OR (mouth mucosa cancer[Title/Abstract])) OR (oral cancer[Title/Abstract])) OR (oral cavity cancer[Title/Abstract])) OR (mouth tumor[Title/Abstract])) OR (buccal mucosa tumor[Title/Abstract])) OR (buccal mucosa tumour[Title/Abstract])) OR (intraoral tumor[Title/Abstract])) OR (intraoral tumour[Title/Abstract])) OR (mouth cavity tumor[Title/Abstract])) OR (mouth cavity tumour[Title/Abstract]))                                                                                                                                                                                                                                                                                                                                                                                             | 76064   |
| #4            | "Mouth Neoplasms"[Mesh]<br>((((((((((((((((((((((((((((((((((((((((Mouth Neoplasms[Title/Abstract] OR (Mouth Neoplasm[Title/Abstract])) OR (Neoplasm, Mouth[Title/Abstract])) OR (Neoplasms, Oral[Title/Abstract])) OR (Neoplasm, Oral[Title/Abstract])) OR (Oral Neoplasm[Title/Abstract])) OR (Oral Neoplasms[Title/Abstract])) OR (Neoplasms, Mouth[Title/Abstract])) OR (Cancer of Mouth[Title/Abstract])) OR (Mouth Cancers[Title/Abstract])) OR (Oral Cancer[Title/Abstract])) OR (Cancer, Oral[Title/Abstract])) OR (Cancers, Oral[Title/Abstract])) OR (Oral Cancers[Title/Abstract])) OR (Cancer of the Mouth[Title/Abstract])) OR (Mouth Cancer[Title/Abstract])) OR (Cancer, Mouth[Title/Abstract])) OR (Cancers, Mouth[Title/Abstract])) OR (cancer, mouth[Title/Abstract])) OR (intraoral cancer[Title/Abstract])) OR (mouth mucosa cancer[Title/Abstract])) OR (oral cancer[Title/Abstract])) OR (oral cavity cancer[Title/Abstract])) OR (mouth tumor[Title/Abstract])) OR (buccal mucosa tumor[Title/Abstract])) OR (buccal mucosa tumour[Title/Abstract])) OR (intraoral tumor[Title/Abstract])) OR (intraoral tumour[Title/Abstract])) OR (mouth cavity tumor[Title/Abstract])) OR (mouth cavity tumour[Title/Abstract]))                                                                                                                                                                                                                                                                                                                                                                                             | 29812   |

#5

---

tumour[Title/Abstract])) OR (mouth neoplasm[Title/Abstract])) OR (mouth neoplasms[Title/Abstract])) OR (mouth tumour[Title/Abstract])) OR (oral cavity tumor[Title/Abstract])) OR (oral cavity tumour[Title/Abstract])) OR (oral mucosa tumor[Title/Abstract])) OR (oral mucosa tumour[Title/Abstract])) OR (oral tumor[Title/Abstract])) OR (oral tumour[Title/Abstract])) OR (tumor, mouth[Title/Abstract])) OR (tumour, mouth[Title/Abstract])) ("Periodontitis"[Mesh]) OR (((((((((((((((((((((((((((((((((((((((Periodontitis[Title/Abstract])) OR (Periodontitides[Title/Abstract])) OR (Pericementitis[Title/Abstract])) OR (Pericementitides[Title/Abstract])) OR (Paradontitis[Title/Abstract])) OR (Parodontitis[Title/Abstract])) OR (peridontitis[Title/Abstract])) OR (periodontal diseases[Title/Abstract])) OR (Disease, Periodontal[Title/Abstract])) OR (Diseases, Periodontal[Title/Abstract])) OR (Periodontal Disease[Title/Abstract])) OR (Parodontosis[Title/Abstract])) OR (Parodontoses[Title/Abstract])) OR (Pyorrhea Alveolaris[Title/Abstract])) OR (dental loss[Title/Abstract])) OR (dental migration[Title/Abstract])) OR (dental mobility[Title/Abstract])) OR (furcation defects[Title/Abstract])) OR (mesial movement of teeth[Title/Abstract])) OR (paradental disease[Title/Abstract])) OR (paradontopathy[Title/Abstract])) OR (paraodontopathy[Title/Abstract])) OR (parodontopathy[Title/Abstract])) OR (parodontal disease[Title/Abstract])) OR (parodontium disease[Title/Abstract])) OR (parodontive tissue disease[Title/Abstract])) OR (peridontal disease[Title/Abstract])) OR (peridontal tissue disease[Title/Abstract])) OR (peridontium disease[Title/Abstract])) OR (periodontal atrophy[Title/Abstract])) OR (periodontal attachment loss[Title/Abstract])) OR (periodontal infection[Title/Abstract])) OR (periodontium disease[Title/Abstract])) OR (periodontopathy[Title/Abstract])) OR (tooth loss[Title/Abstract])) OR (tooth migration[Title/Abstract])) OR (tooth mobility'[Title/Abstract])) OR (tooth movement[Title/Abstract]))

#6

("Mouth Neoplasms"[Mesh]) OR (((((((((((((((((((((((((((((((((((((((Mouth Neoplasms[Title/Abstract])) OR (Mouth Neoplasm[Title/Abstract])) OR (Neoplasm, Mouth[Title/Abstract])) OR (Neoplasms, Oral[Title/Abstract])) OR (Neoplasm, Oral[Title/Abstract])) OR (Oral Neoplasm[Title/Abstract])) OR (Oral Neoplasms[Title/Abstract])) OR (Neoplasms, Mouth[Title/Abstract])) OR (Cancer of Mouth[Title/Abstract])) OR (Mouth Cancers[Title/Abstract])) OR (Oral Cancer[Title/Abstract])) OR (Cancer, Oral[Title/Abstract])) OR (Cancers, Oral[Title/Abstract])) OR (Oral Cancers[Title/Abstract])) OR (Cancer of the Mouth[Title/Abstract])) OR (Mouth Cancer[Title/Abstract])) OR (Cancer, Mouth[Title/Abstract])) OR (cancer, mouth[Title/Abstract])) OR (intraoral cancer[Title/Abstract])) OR (mouth mucosa cancer[Title/Abstract])) OR (oral cancer[Title/Abstract])) OR (oral cavity cancer[Title/Abstract])) OR (mouth tumor[Title/Abstract])) OR (buccal mucosa tumor[Title/Abstract])) OR (buccal mucosa tumour[Title/Abstract])) OR (intraoral tumor[Title/Abstract])) OR (intraoral tumour[Title/Abstract])) OR (mouth cavity tumor[Title/Abstract])) OR (mouth cavity tumour[Title/Abstract])) OR (mouth neoplasm[Title/Abstract])) OR (mouth neoplasms[Title/Abstract])) OR (mouth tumour[Title/Abstract])) OR (oral cavity tumor[Title/Abstract])) OR (oral cavity

---



---

tumor[Title/Abstract])) OR (oral tumour[Title/Abstract])) OR (tumor,  
mouth[Title/Abstract])) OR (tumour, mouth[Title/Abstract]))

---

## 2.Cochrane

| Search number | Query                                                                                                                                                                                 |
|---------------|---------------------------------------------------------------------------------------------------------------------------------------------------------------------------------------|
| #1            | MeSH descriptor: [Periodontitis] explode all trees                                                                                                                                    |
| #2            | (Periodontitis):ti,ab,kw OR (Periodontitides):ti,ab,kw OR (Pericementitis):ti,ab,kw OR<br>(Pericementitides):ti,ab,kw OR (Paradontitis):ti,ab,kw                                      |
| #3            | (Parodontitis):ti,ab,kw OR (peridontitis):ti,ab,kw OR (periodontal diseases):ti,ab,kw OR (Disease,<br>Periodontal):ti,ab,kw OR (Diseases, Periodontal):ti,ab,kw                       |
| #4            | (Periodontal Disease):ti,ab,kw OR (Parodontosis):ti,ab,kw OR (Parodontoses):ti,ab,kw OR (Pyorrhoea<br>Alveolaris):ti,ab,kw OR (dental loss):ti,ab,kw                                  |
| #5            | (dental migration):ti,ab,kw OR (dental mobility):ti,ab,kw OR (furcation defects):ti,ab,kw OR (mesial<br>movement of teeth):ti,ab,kw OR (paradontal disease):ti,ab,kw                  |
| #6            | (paradontopathy):ti,ab,kw OR (paraodontopathy'):ti,ab,kw OR (parodontopathy):ti,ab,kw OR (parodontal<br>disease):ti,ab,kw OR (parodontium disease):ti,ab,kw                           |
| #7            | (parodontive tissue disease):ti,ab,kw OR (peridontal disease):ti,ab,kw OR (peridontal tissue<br>disease):ti,ab,kw OR (peridontium disease):ti,ab,kw OR (periodontal atrophy):ti,ab,kw |
| #8            | (periodontal attachment loss):ti,ab,kw OR (periodontal infection'):ti,ab,kw OR (periodontium<br>disease):ti,ab,kw OR (periodontopathy):ti,ab,kw OR (tooth loss'):ti,ab,kw             |
| #9            | (tooth migration):ti,ab,kw OR (tooth mobility):ti,ab,kw OR (tooth movement):ti,ab,kw                                                                                                  |
| #10           | #1 or #2 or #3 or #4 or #5 or #6 or #7 or #8 or #9                                                                                                                                    |
| #11           | MeSH descriptor: [Mouth Neoplasms] explode all trees                                                                                                                                  |
| #12           | (Mouth Neoplasms):ti,ab,kw OR (Mouth Neoplasm):ti,ab,kw OR (Neoplasm, Mouth):ti,ab,kw OR<br>(Neoplasms, Oral):ti,ab,kw OR (Neoplasm, Oral):ti,ab,kw                                   |
| #13           | (Oral Neoplasm):ti,ab,kw OR (Oral Neoplasms):ti,ab,kw OR (Neoplasms, Mouth):ti,ab,kw OR (Cancer<br>of Mouth):ti,ab,kw OR (Mouth Cancers):ti,ab,kw                                     |
| #14           | (Oral Cancer):ti,ab,kw OR (Cancer, Oral):ti,ab,kw OR (Cancers, Oral):ti,ab,kw OR (Oral<br>Cancers):ti,ab,kw OR (Cancer of the Mouth):ti,ab,kw                                         |
| #15           | (Mouth Cancer):ti,ab,kw OR (Cancer, Mouth):ti,ab,kw OR (Cancers, Mouth):ti,ab,kw OR (cancer,<br>mouth):ti,ab,kw OR (intraoral cancer):ti,ab,kw                                        |
| #16           | (mouth mucosa cancer):ti,ab,kw OR (oral cancer):ti,ab,kw OR (oral cavity cancer):ti,ab,kw OR (mouth<br>tumor):ti,ab,kw OR (buccal mucosa tumor):ti,ab,kw                              |
| #17           | (buccal mucosa tumour):ti,ab,kw OR (intraoral tumor):ti,ab,kw OR (intraoral tumour):ti,ab,kw OR<br>(mouth cavity tumor):ti,ab,kw OR (mouth cavity tumour):ti,ab,kw                    |
| #18           | (mouth neoplasm):ti,ab,kw OR (mouth neoplasms):ti,ab,kw OR (mouth tumour):ti,ab,kw OR (oral cavity<br>tumor):ti,ab,kw OR (oral cavity tumour):ti,ab,kw                                |
| #19           | (oral mucosa tumor):ti,ab,kw OR (oral mucosa tumour):ti,ab,kw OR (oral tumor):ti,ab,kw OR (oral<br>tumour):ti,ab,kw OR (tumor, mouth):ti,ab,kw                                        |
| #20           | (tumour, mouth):ti,ab,kw                                                                                                                                                              |
| #21           | #11 or #12 or #13 or #14 or #15 or #16 or #17 or #18 or #19 or #20                                                                                                                    |
| #22           | #10 and #21                                                                                                                                                                           |

---

### 3.Embase

| Search number | Query                                                                                                                                                                                                                                                                                                                                                                                                                                                                                                                                                                                                                                                                                                                                                                                                                                                                                                                                                                                                                                                                                                                                                           | Records |
|---------------|-----------------------------------------------------------------------------------------------------------------------------------------------------------------------------------------------------------------------------------------------------------------------------------------------------------------------------------------------------------------------------------------------------------------------------------------------------------------------------------------------------------------------------------------------------------------------------------------------------------------------------------------------------------------------------------------------------------------------------------------------------------------------------------------------------------------------------------------------------------------------------------------------------------------------------------------------------------------------------------------------------------------------------------------------------------------------------------------------------------------------------------------------------------------|---------|
| #1            | 'periodontitis'/exp<br>'periodontitis'/exp OR periodontitis OR periodontitides:ab,ti OR pericementitis:ab,ti OR pericementitides:ab,ti OR paradontitis:ab,ti OR parodontitis:ab,ti OR peridontitis:ab,ti OR 'periodontal diseases':ab,ti OR 'disease, periodontal':ab,ti OR 'diseases, periodontal':ab,ti OR 'periodontal disease':ab,ti OR parodontosis:ab,ti OR parodontoses:ab,ti OR 'pyorrhea alveolaris':ab,ti OR 'dental loss':ab,ti OR 'dental migration':ab,ti OR 'dental mobility':ab,ti OR 'furcation defects':ab,ti OR 'mesial movement of teeth':ab,ti OR 'paradontal disease':ab,ti OR paradontopathy:ab,ti OR paraodontopathy:ab,ti OR parodontopathy:ab,ti OR 'parodontal disease':ab,ti OR 'parodontium disease':ab,ti OR 'parodontive tissue disease':ab,ti OR 'peridontal disease':ab,ti OR 'peridontal tissue disease':ab,ti OR 'peridontium disease':ab,ti OR 'periodontal atrophy':ab,ti OR 'periodontal attachment loss':ab,ti OR 'periodontal infection':ab,ti OR 'periodontium disease':ab,ti OR periodontopathy:ab,ti OR 'tooth loss':ab,ti OR 'tooth migration':ab,ti OR 'tooth mobility':ab,ti OR 'tooth movement':ab,ti             | 53364   |
| #2            |                                                                                                                                                                                                                                                                                                                                                                                                                                                                                                                                                                                                                                                                                                                                                                                                                                                                                                                                                                                                                                                                                                                                                                 | 85492   |
| #3            | #1 OR #2                                                                                                                                                                                                                                                                                                                                                                                                                                                                                                                                                                                                                                                                                                                                                                                                                                                                                                                                                                                                                                                                                                                                                        | 85492   |
| #4            | 'mouth tumor'/exp<br>'mouth neoplasms'/exp OR 'mouth neoplasms' OR (('mouth'/exp OR mouth) AND ('neoplasms'/exp OR neoplasms)) OR 'neoplasm, mouth':ab,ti OR 'neoplasms, oral':ab,ti OR 'neoplasm, oral':ab,ti OR 'oral neoplasm':ab,ti OR 'oral neoplasms':ab,ti OR 'neoplasms, mouth':ab,ti OR 'cancer of mouth':ab,ti OR 'mouth cancers':ab,ti OR 'cancer, oral':ab,ti OR 'cancers, oral':ab,ti OR 'oral cancers':ab,ti OR 'cancer of the mouth':ab,ti OR 'cancers, mouth':ab,ti OR 'mouth cancer':ab,ti OR 'cancer, mouth':ab,ti OR 'intraoral cancer':ab,ti OR 'mouth mucosa cancer':ab,ti OR 'oral cancer':ab,ti OR 'oral cavity cancer':ab,ti OR 'mouth tumor':ab,ti OR 'buccal mucosa tumor':ab,ti OR 'buccal mucosa tumour':ab,ti OR 'intraoral tumor':ab,ti OR 'intraoral tumour':ab,ti OR 'mouth cavity tumor':ab,ti OR 'mouth cavity tumour':ab,ti OR 'mouth neoplasm':ab,ti OR 'mouth neoplasms':ab,ti OR 'mouth tumour':ab,ti OR 'oral cavity tumor':ab,ti OR 'oral cavity tumour':ab,ti OR 'oral mucosa tumor':ab,ti OR 'oral mucosa tumour':ab,ti OR 'oral tumor':ab,ti OR 'oral tumour':ab,ti OR 'tumor, mouth':ab,ti OR 'tumour, mouth':ab,ti | 148941  |
| #5            |                                                                                                                                                                                                                                                                                                                                                                                                                                                                                                                                                                                                                                                                                                                                                                                                                                                                                                                                                                                                                                                                                                                                                                 | 209985  |
| #6            | #4 OR #5                                                                                                                                                                                                                                                                                                                                                                                                                                                                                                                                                                                                                                                                                                                                                                                                                                                                                                                                                                                                                                                                                                                                                        | 209985  |
| #7            | #3 AND #6                                                                                                                                                                                                                                                                                                                                                                                                                                                                                                                                                                                                                                                                                                                                                                                                                                                                                                                                                                                                                                                                                                                                                       | 2636    |

### 4.Web of science

| Search number | Query                                                                                                                                                                                                                                                                                                                                                                                                                                                                                                                                                                                                                                     |
|---------------|-------------------------------------------------------------------------------------------------------------------------------------------------------------------------------------------------------------------------------------------------------------------------------------------------------------------------------------------------------------------------------------------------------------------------------------------------------------------------------------------------------------------------------------------------------------------------------------------------------------------------------------------|
| #1            | <b>Periodontitis (MeSH) or Periodontitides (MeSH) or Pericementitis (MeSH) or Pericementitides (MeSH) or Paradontitis (MeSH) or Parodontitis (MeSH) or peridontitis (MeSH) or periodontal diseases (MeSH) or Disease, Periodontal (MeSH) or Diseases, Periodontal (MeSH) or Periodontal Disease (MeSH) or Parodontosis (MeSH) or Parodontoses (MeSH) or Pyorrhea Alveolaris (MeSH) or dental loss (MeSH) or dental migration (MeSH) or dental mobility (MeSH) or furcation defects (MeSH) or mesial movement of teeth (MeSH) or paradontal disease (MeSH) or paradontopathy (MeSH) or paraodontopathy (MeSH) or parodontopathy (MeSH)</b> |

---

) or **parodontal disease (MeSH)** or **parodontium disease (MeSH)** or **parodontive tissue disease (MeSH)** or **peridontal disease (MeSH)** or **peridontal tissue disease (MeSH)** or **peridontium disease (MeSH)** or **periodontal atrophy (MeSH)** or **periodontal attachment loss (MeSH)** or **periodontal infection (MeSH)** or **periodontium disease (MeSH)** or **periodontopathy (MeSH)** or **tooth loss (MeSH)** or **tooth migration (MeSH)** or **tooth mobility (MeSH)** or **tooth movement (MeSH)**

Mouth Neoplasms (**MeSH**) or Mouth Neoplasm (**MeSH**) or Neoplasm, Mouth (**MeSH**) or Neoplasms, Oral (**MeSH**) or Neoplasm, Oral (**MeSH**) or Oral Neoplasm (**MeSH**) or Oral Neoplasms, Mouth (**MeSH**) or Cancer of Mouth (**MeSH**) or Mouth Cancers (**MeSH**) or Oral Cancer (**MeSH**) or Cancer, Oral (**MeSH**) or Cancers, Oral (**MeSH**) or Oral Cancers (**MeSH**) or Cancer of the Mouth (**MeSH**) or Mouth Cancer (**MeSH**) or Cancer, Mouth (**MeSH**) or Cancers, Mouth (**MeSH**) or cancer, mouth (**MeSH**) or intraoral cancer (**MeSH**) or mouth mucosa cancer (**MeSH**) or oral cancer (**MeSH**) or oral cavity cancer (**MeSH**) or mouth tumor (**MeSH**) or buccal mucosa tumor (**MeSH**) or buccal mucosa tumour (**MeSH**) or intraoral tumor (**MeSH**) or intraoral tumour (**MeSH**) or mouth cavity tumor (**MeSH**) or mouth cavity tumour (**MeSH**) or mouth neoplasm (**MeSH**) or mouth neoplasms (**MeSH**) or mouth tumour (**MeSH**) or oral cavity tumor (**MeSH**) or oral cavity tumour (**MeSH**) or oral mucosa tumor (**MeSH**) or oral mucosa tumour (**MeSH**) or oral tumor (**MeSH**) or oral tumour (**MeSH**) or tumor, mouth (**MeSH**) or tumour, mouth (**MeSH**)

#2

#3

#1 AND #2

---
